# Supplementary material for: A flexible biomimetic superhydrophobic and superoleophilic 3D macroporous polymer-based robust network for the efficient separation of oil-contaminated water
Source: Royal Society of Chemistry journal article supplement (doi:10.1039/c9ra06579b), 2020-01-01
Supplement: c9ra06579b1.pdf [file c9ra06579b1.pdf]

Supplementary file

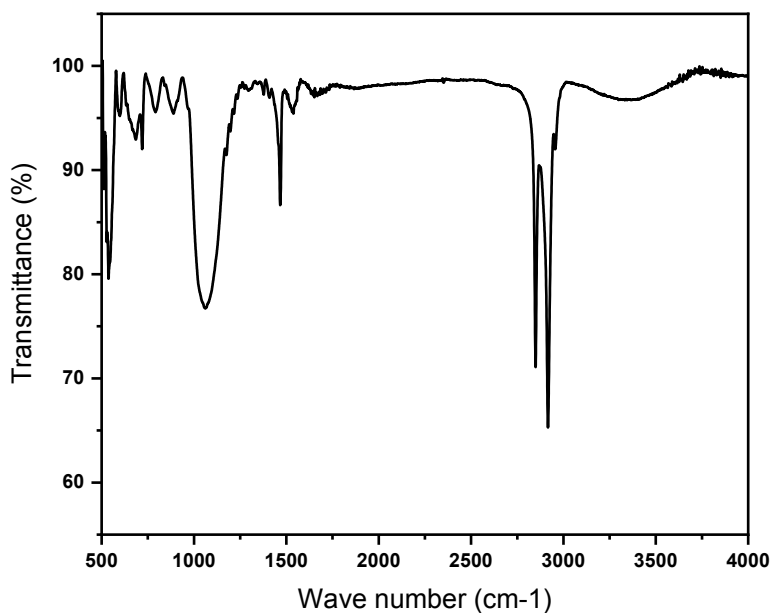

**Fig. S1** FTIR spectra of the regenerated ODTCS-SiO<sub>2</sub>-PP-PU

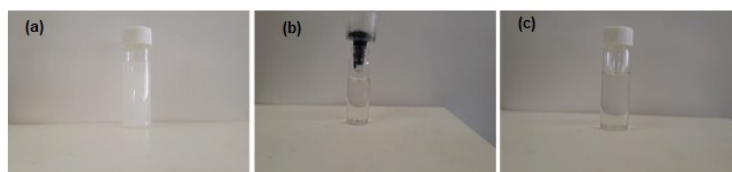

**Fig. S2** Separation of surfactant free water in oil emulsion (A) water in oil emulsion, (B) Separation process, (C) Separated oil from water by using the ODTCS-SiO<sub>2</sub>-PP-PU

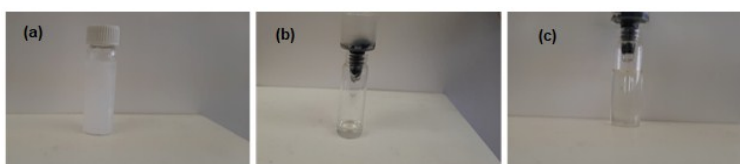

**Fig. S3** Separation of surfactant stabilized water in oil emulsion (A) water in oil emulsion, (B) Separation process, (C) Separated oil from water by using the ODTCS-SiO<sub>2</sub>-PP-PU
